# Supplementary material
Source: ML conference proceedings conference paper supplement (https://openaccess.thecvf.com/content/ICCV2025/html/Zhang_Enhancing_Zero-shot_Object_ICCV_2025_paper.html)
Supplement: Supplementary file 1 [file Zhang_Enhancing_Zero-shot_Object_ICCV_2025_supplemental.pdf]

# Enhancing Zero-shot Object Counting via Text-guided Local Ranking and Number-evoked Global Attention

## Supplementary Material

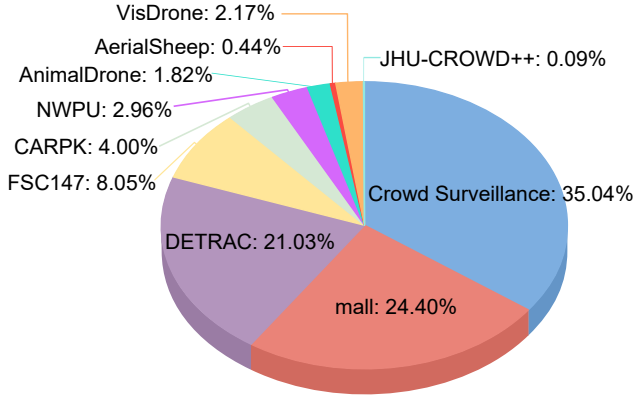

Figure 7. Proportions of each dataset in our ZSC-8K.

|        | #Images | #Classes | Avg | Total   |
|--------|---------|----------|-----|---------|
| SHA    | 482     | 1        | 501 | 241677  |
| JHU    | 4372    | 1        | 346 | 1515005 |
| NWPU   | 5109    | 1        | 418 | 2133238 |
| MALL   | 2000    | 1        | 31  | 62325   |
| CARPK  | 1448    | 1        | 62  | 89777   |
| DETRAC | 14000   | 1        | 86  | 1210000 |
| ZSC-8K | 8361    | 114      | 46  | 386498  |

Table 7. Comparisons with class-specific datasets.

|                    | Val set      |              | Test set     |              |
|--------------------|--------------|--------------|--------------|--------------|
|                    | MAE          | RMSE         | MAE          | RMSE         |
| all patch features | 12.31        | 62.81        | 11.60        | 107.31       |
| avgp               | <b>11.09</b> | <b>60.48</b> | <b>10.74</b> | <b>106.5</b> |

Table 8. Ablation study on the global feature. “avgp” means average pooling.

## 7. Dataset statistics

Images of ZSC-8K dataset are collected from multiple existing datasets: FSC-147 [38], JHU-Crowd [43], NWPU-Crowd [46], VisDrone [57], DETRAC [47], CARPK [15], MALL [7] and Crowd Surveillance [50]. The proportions of each dataset are depicted in Fig. 7.

Besides, in our proposed ZSC-8K dataset, the number of point annotations in an image ranges from 1 to 1,766. The histogram illustrated in Fig. 8 shows that the number of images which have 20 to 50 points annotations is the largest. And the ZSC-8K dataset is compared to other datasets in Tab. 7.

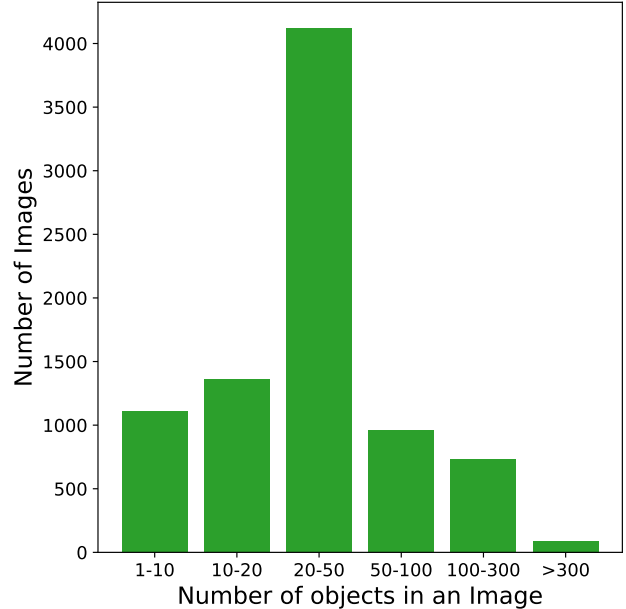

Figure 8. Number of images in several ranges of object count.

| Splits            | Val set      |              | Test set     |               |
|-------------------|--------------|--------------|--------------|---------------|
|                   | MAE          | RMSE         | MAE          | RMSE          |
| 6 coarse → 6 fine | 18.21        | 60.21        | 16.46        | 101.35        |
| 5 coarse → 5 fine | <b>17.52</b> | <b>58.39</b> | <b>16.42</b> | <b>100.63</b> |
| 4 coarse → 4 fine | 18.35        | 60.70        | 16.66        | 101.05        |

Table 9. Performance of using different number ranges.

## 8. Ablation Study

**The global feature in GDino-based methods.** Because the selected number-evoked text prompt represents global information, global image-level feature is used to make cross-attention with it. Since the Swin-T used in GDino does not have a token can represent global feature, we try two ways to construct a global feature. Firstly, we use all patch-level features directly to make cross-attention with number-evoked text prompt. Then, we use all patch-level features to construct a global feature by average pooling. Tab. 8 shows that the global feature generated by average pooling achieves better performance. Since the number-evoked text prompt does not match each of the patch-level features.

**Number ranges.** The number ranges (5 coarse → 5 fine splits) are used for all datasets. Moreover, an ablation study is conducted on the number ranges with FSC in Tab. 9. It

| Method         | <10  |       | 10-100 |       | 100-1000 |       | >1000   |         |
|----------------|------|-------|--------|-------|----------|-------|---------|---------|
|                | MAE  | RMSE  | MAE    | RMSE  | MAE      | RMSE  | MAE     | RMSE    |
| ClipCount      | 7.14 | 13.67 | 10.88  | 46.15 | 33.94    | 52.20 | 1718.42 | 2294.33 |
| ClipCount+Ours | 5.89 | 10.17 | 9.60   | 37.72 | 32.54    | 51.02 | 1706.89 | 2268.71 |

Table 10. The performance across different count magnitudes.

| Method         | Training→ Testing | MAE         | RMSE        |
|----------------|-------------------|-------------|-------------|
| RCC [13]       | FSC→CARPK         | 21.38       | 26.15       |
| ClipCount [18] | FSC→CARPK         | 11.96       | 16.61       |
| VLCounter [20] | FSC→CARPK         | 8.68        | 10.37       |
| CountGD* [3]   | FSC→CARPK         | 3.94        | 5.23        |
| ClipCount+Ours | FSC→CARPK         | 10.13       | 13.28       |
| VLCounter+Ours | FSC→CARPK         | 8.08        | 9.64        |
| CountGD+Ours   | FSC→CARPK         | <b>3.71</b> | <b>4.96</b> |

Table 11. Cross-dataset evaluation on CARPK dataset. “FSC” means FSC-147 dataset. \* means the results are reproduced by open-source codes.

shows that our design of number ranges (5 coarse → 5 fine splits) is optimal. Indeed, both 6 splits and 4 splits still work, which verifies the efficiency of the NGA.

## 9. Analysis

**Performance across different count magnitudes.** Experiments are conducted on the test set of FSC dataset to analyze the performance across different count magnitudes in Tab. 10. Our method outperforms the baseline on all 4 splits, which verifies that our proposed NGA can enhance the counting ability of VLMs. Besides, the experimental results also show that counting models face challenges when dealing with high-count images (>1000).

**The generalizing ability on CARPK dataset.** We make a comparison between our method and other ZSC methods on CARPK [15] in Tab. 11. Specifically, we apply our strategy to three baselines: ClipCount [18], VLCounter [20] and CounGD [3]. The results show that our strategy largely improve the baselines. On ClipCount, we gain 1.83 MAE and 3.33 RMSE improvement. On VLCounter, we obtain 0.6 and 0.73 points improvement on MAE and RMSE respectively. Furthermore, we achieve the best performance with CountGD which shows 3.71 MAE and 4.96 RMSE.

## 10. Details of cross-attention.

We use the global image-level feature as query and the number-evoked text prompt with highest similarity score as key and value. It can be roughly represented as:

$$F_{ca} = \text{proj\_drop}(\text{proj}(\text{attn\_drop}(\text{softmax}(\frac{q \cdot k^T}{\sqrt{C/H}}) \cdot v))), \quad (8)$$

where  $q = w_q(F_g), k = w_k(F_{ct}^i), v = w_v(F_{ct}^i)$ ,  $w_q, w_k$  and  $w_v$  are learnable parameters.  $F_{ca}$  is the output features.

And by following the above steps, we can guarantee that the cross-attention in our work is useful.

## 11. Visualizations

To further demonstrate the effectiveness of our proposed strategy. We visualize some results on the ZSC-8K dataset in Fig. 9 and some results on FSC-147 dataset in Fig. 10. As the two figures show, the results in the bottom rows of the two figures are better than the results in the top rows. The visualizations further verify that our strategy is effective. Besides, in Fig. 11, we present some failure cases. It demonstrates that our method may face challenges when dealing with scenarios involving high counts.

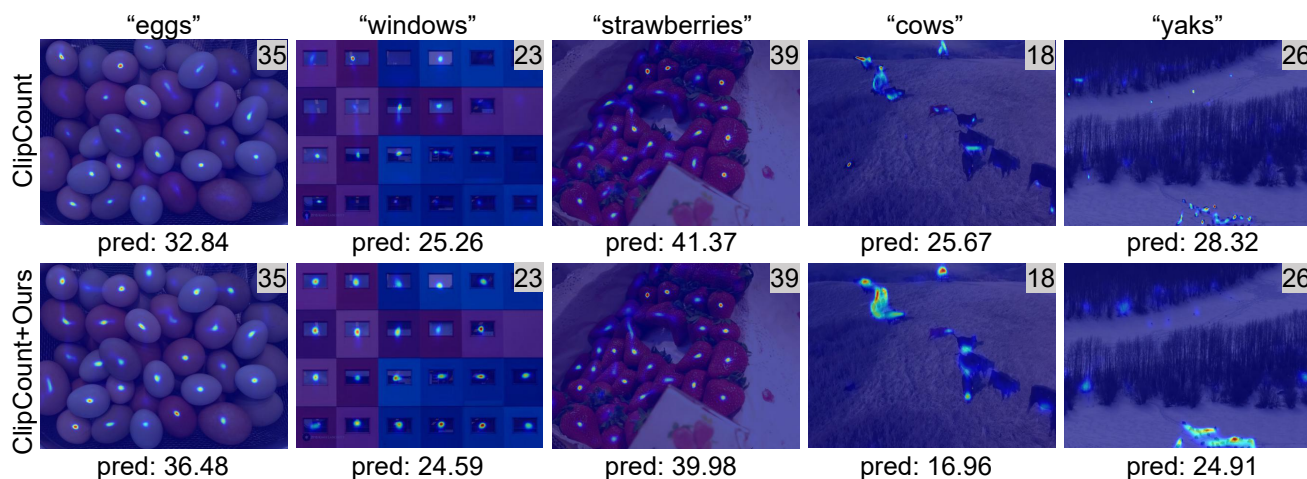

Figure 9. Qualitative results on our ZSC-8K Dataset. Ground-truth numbers are shown at the top-right corner.

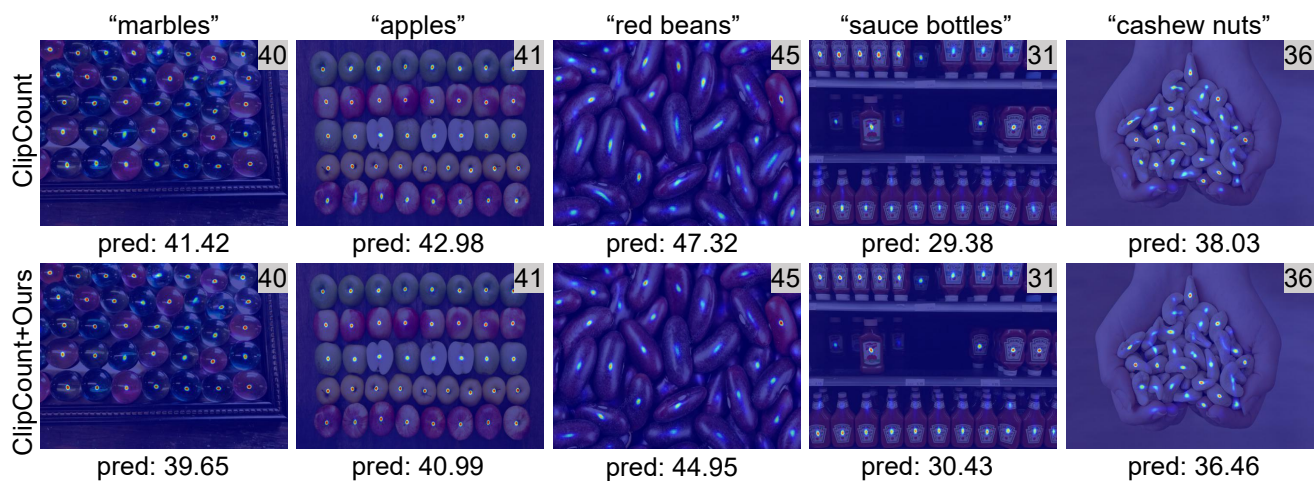

Figure 10. Qualitative results on FSC-147 Dataset. Ground-truth numbers are shown at the top-right corner.

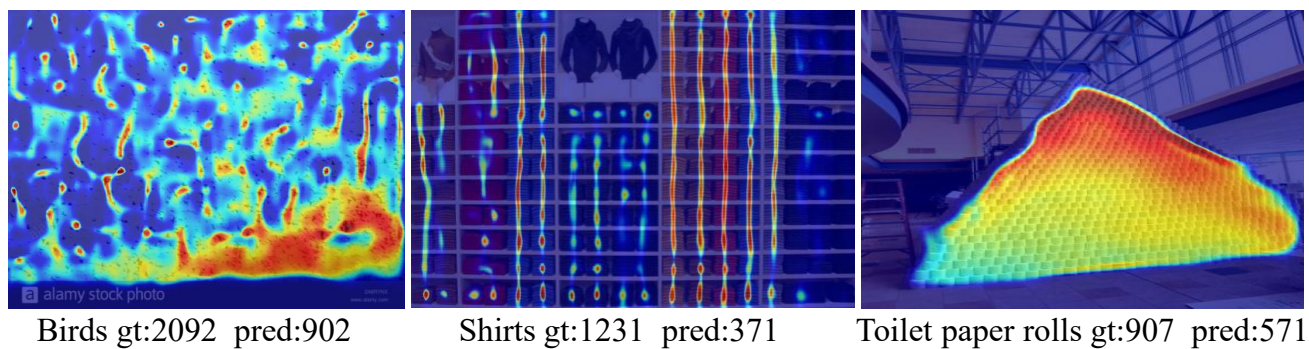

Figure 11. Failure cases.
